# Supplementary material for: Interactive Improvements of Visual and Auditory Function for Enhancing Performance in Youth Soccer Players
Source: MDPI journal article supplement (doi:10.3390/ijerph16244909), 2019-12-05
Supplement: s1 [file s1]

**Table S1.** 16-week physical fitness and basic skills training program.

| No. | Training Topic                                                                            | Instruction Detail                                                                                       |
|-----|-------------------------------------------------------------------------------------------|----------------------------------------------------------------------------------------------------------|
| 1   | Ball Sense Training<br>(inside, outside)<br>Body Balance Training<br>(coordination)       | Acquiring soccer skills through ball sense training and ladder step training                             |
| 2   | Dribble Shooting<br>(inside, outside)<br>Body Balance Training<br>(coordination)          | Shooting after various dribbles<br>Obtain a variety of technical skills through ladder step training     |
| 3   | Practice Game                                                                             | Instructive game activity with various techniques and cooperation in a given position                    |
| 4   | Dribbling Training                                                                        | Develop dribbling ability to change direction                                                            |
| 5   | 1:1 Shooting Drill                                                                        | Cultivate ability to gain control over opponent through various dribble techniques and shooting training |
| 6   | Skill Training<br>(ball control)                                                          | Understand ball control and develop ability to stop and keep the ball coming                             |
| 7   | Pass Practice<br>(inside, outside)                                                        | Accurate delivery of ball to teammate standing still through inside pass and outside pass training       |
| 8   | Friendly Match                                                                            | Perform various techniques and cooperative programs according to given positions                         |
| 9   | Ball Sense Training<br>(inside, outside, sole)<br>Body Balance Training<br>(coordination) | Acquire soccer skills through continuous ball sense training and ladder step training                    |
| 10  | Dribble Shooting<br>(inside, outside, sole)<br>Body Balance Training<br>(coordination)    | Use the insider and outside of the foot, but use the soles to learn how to shoot after dribbling         |
| 11  | 1:1, 2:2 Shooting Drills                                                                  | Cultivate ability to gain control over opponent through various dribble techniques and shooting training |
| 12  | Friendly Match                                                                            | Perform various techniques and cooperative programs according to given positions                         |
| 13  | Dribble Training<br>Body Balance Training<br>(coordination)                               | Obtain techniques to gain control over opponent through directional dribbling                            |
| 14  | Skill Training<br>(ball movement control)                                                 | Understand ball control and improve movement control ability using various parts of the body             |
| 15  | Pass Practice<br>(inside, outside)                                                        | Develop ability to accurately pass to moving teammates                                                   |
| 16  | Friendly Match                                                                            | Perform various techniques and cooperative programs according to given positions                         |

**Table S2.** 6-week intensive training program.

| Week | No. | Training Topic                                                                 | Instruction Detail                                                                                                                                                                                                            |
|------|-----|--------------------------------------------------------------------------------|-------------------------------------------------------------------------------------------------------------------------------------------------------------------------------------------------------------------------------|
| 1    | 1   | Dribble Training I-II<br>(switching direction & dribbling)                     | Flexible use of situation determination, change of dribble speed, etc.<br>Make necessary space in offense situation through dribbling                                                                                         |
|      | 2   | Striker Movement Training<br>(1:1)                                             | Quickly dribble into empty space                                                                                                                                                                                              |
|      | 3   | 11 vs 11 Game                                                                  | Understand position, induce competitiveness, motivation                                                                                                                                                                       |
| 2    | 4   | Dribble Training I-II<br>(dribbling & shooting)                                | Focus on accurate shooting by dribbling quickly in offense direction<br>Improve dribbling ability in case of competition                                                                                                      |
|      | 5   | Passing Game & Side Play                                                       | Strength-controlled coaching of passes<br>Set path target point after recognizing surrounding situation<br>2:1 pass coaching on the side                                                                                      |
|      | 6   | 11 vs 11 Game                                                                  | Understand position, induce competitiveness, motivation                                                                                                                                                                       |
|      | 7   | Dribble Training I-II<br>(dribble & pass)                                      | Rhythmic dribbling<br>Dribble & pass considering the defense position and movement (situation recognition)                                                                                                                    |
| 3    | 8   | 6 vs 5 Strategy Training and Total Drill                                       | Timed pass to the player to the right<br>Second movement check for ball                                                                                                                                                       |
|      | 9   | 11 vs 11 Game                                                                  | Understand position, induce competitiveness, motivation                                                                                                                                                                       |
| 4    | 10  | Dribble Training I-II<br>(technical dribbling & competitive situation offense) | Improve fast dribbling ability to recognize defense position and distance<br>Space invasion and shooting after offense direction dribbling                                                                                    |
|      | 11  | 1:1, 2:1, 2:2 Central Offense                                                  | Secure clear view by lifting your head so you can better understand the situation<br>Improve quick dribbling ability by recognizing the defense position and distance from the front<br>Speedy dribble to connect the shooter |
|      | 12  | 11 vs 11 Game                                                                  | Understand position, induce competitiveness, motivation                                                                                                                                                                       |
|      | 13  | 1:1, 2:1 Side Offense                                                          | Speed change coaching when you move to deceive your opponent<br>Combination play in terms of overlap, underlap, etc.                                                                                                          |
| 5    | 14  | 1:1 Individual Defense                                                         | Acceleration and deceleration maintaining proper distance and angle to target point<br>Step-by-step switching direction instruction                                                                                           |
|      | 15  | 11 vs 11 Game                                                                  | Understand position, induce competitiveness, motivation                                                                                                                                                                       |
| 6    | 1   | 2:2 Cooperative Defense                                                        | Instruction on ball pressure and cover play<br>Predicting opponent's unstable ball touch and emphasis on active cooperative defense                                                                                           |
|      | 2   | Strategy Training and Total Drill                                              | Organic motion coaching according to ball flow<br>Positioning and speed change coaching                                                                                                                                       |
|      | 3   | 11 vs 11 Game                                                                  | Understand position, induce competitiveness, motivation                                                                                                                                                                       |

**Table S3.** Change of health-related physical fitness parameters after training.

| Variable                                                                 | Pre-training | Post-training | t         |
|--------------------------------------------------------------------------|--------------|---------------|-----------|
| Muscle mass (kg)                                                         | 25.10±6.46   | 26.92±6.99    | -8.679*** |
| Fat mass (kg)                                                            | 21.30±9.12   | 18.53±8.45    | 5.205***  |
| Cardiovascular endurance (laps)                                          | 57.79±20.69  | 67.71±22.90   | -6.727*** |
| Muscular endurance (times/30sec)                                         | 19.87±6.32   | 22.47±6.36    | -8.503*** |
| Flexibility (cm)                                                         | 8.45±3.36    | 9.95±4.27     | -6.547*** |
| Paired t-test. Values are mean ± SD. Note: ***p < 0.001 vs pre-training. |              |               |           |

**Table S4.** Change of skill-related physical fitness parameters after training.

| Variable                                                                 | Pre-training | Post-training | t         |
|--------------------------------------------------------------------------|--------------|---------------|-----------|
| Power (cm)                                                               | 137.06±19.34 | 144.18±18.43  | -8.037*** |
| Agility (times/30sec)                                                    | 16.37±3.03   | 20.61±3.94    | -9.611*** |
| 10 m Dribble time (sec)                                                  | 8.42±2.42    | 7.85±1.83     | 3.569***  |
| 10 m Dribble touch (times)                                               | 8.89±1.62    | 8.44±1.49     | 3.490***  |
| 10 m Pass success count (times)                                          | 5.22±1.88    | 6.12±1.89     | -6.596*** |
| Paired t-test. Values are mean ± SD. Note: ***p < 0.001 vs pre-training. |              |               |           |

**Table S5.** Change of reaction function after training.

| Variable                                                                 | Pre-training | Post-training | t        |
|--------------------------------------------------------------------------|--------------|---------------|----------|
| Visual reaction time (sec)                                               | 0.70±0.16    | 0.61±0.16     | 6.401*** |
| Auditory reaction time (sec)                                             | 0.87±0.2     | 0.77±0.20     | 5.838*** |
| Paired t-test. Values are mean ± SD. Note: ***p < 0.001 vs pre-training. |              |               |          |

**Table S6.** Correlation between reaction function and other parameters pre and post training.

| Variable                                   | Visual reaction time |               | Auditory reaction time |               |
|--------------------------------------------|----------------------|---------------|------------------------|---------------|
|                                            | Pre-training         | Post-training | Pre-training           | Post-training |
| Muscle mass                                | -0.522***            | -0.435**      | -0.220                 | -0.235*       |
| Fat mass                                   | -0.205               | -0.165        | -0.339**               | -0.174        |
| Muscular endurance                         | -0.205               | -0.158        | -0.001                 | -0.133        |
| Power                                      | -0.365**             | -0.348**      | -0.160                 | 0.156         |
| Flexibility                                | 0.022                | 0.157         | 0.056                  | 0.008         |
| Agility                                    | -0.315**             | -0.142        | -0.031                 | -0.011        |
| Cardiovascular endurance                   | -0.236*              | -0.232*       | -0.092                 | -0.150        |
| 10 m Dribble time                          | 0.333**              | 0.278**       | 0.012                  | 0.064         |
| 10 m Dribble touch                         | 0.474***             | 0.425***      | 0.038                  | 0.057         |
| 10 m Pass success count                    | -0.361**             | -0.313**      | -0.017                 | -0.185        |
| Auditory reaction time                     | 0.402***             | 0.496***      |                        |               |
| Note: *p < 0.05, **p < 0.01, ***p < 0.001. |                      |               |                        |               |
